# Supplementary material for: Generation of out-of-plane polarized spin current by non-uniform oxygen octahedral tilt/rotation
Source: PubMed Central journal article supplement — Nat Commun. 2024 Aug 24;15:7299. doi: 10.1038/s41467-024-51820-w (PMC11344798; doi:10.1038/s41467-024-51820-w), 2024-08-24
Supplement: 41467_2024_51820_MOESM2_ESM.pdf [file 41467_2024_51820_MOESM2_ESM.pdf]

## Peer Review File

---

Generation of out-of-plane polarized spin current by non-uniform oxygen octahedral tilt/rotation

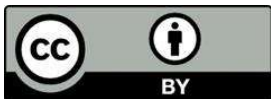

**Open Access** This file is licensed under a Creative Commons Attribution 4.0 International License, which permits use, sharing, adaptation, distribution and reproduction in any medium or format, as long as you give appropriate credit to the original author(s) and the source, provide a link to the Creative Commons license, and indicate if changes were made. In the cases where the authors are anonymous, such as is the case for the reports of anonymous peer reviewers, author attribution should be to 'Anonymous Referee' followed by a clear attribution to the source work. The images or other third party material in this file are included in the article's Creative Commons license, unless indicated otherwise in a credit line to the material. If material is not included in the article's Creative Commons license and your intended use is not permitted by statutory regulation or exceeds the permitted use, you will need to obtain permission directly from the copyright holder. To view a copy of this license, visit <http://creativecommons.org/licenses/by/4.0/>.

**Editorial Note:** Parts of this Peer Review File have been redacted as indicated to remove third-party material where no permission to publish could be obtained.

## REVIEWER COMMENTS

### Reviewer #1 (Remarks to the Author):

The submitted manuscript, “Generation of out-of-plane polarized spin current by non-uniform oxygen octahedral tilt/rotation” is a very clear and thorough paper in which the authors are able to tune the structure of a metallic oxide, CaRuO<sub>3</sub>, in order to allow transmission of a spin current polarized out-of-plane – a configuration generally forbidden by crystalline symmetry. Materials with perpendicular magnetic anisotropy (PMA) have become favorable for spintronic devices due to their ability to scale to smaller lateral sizes. Using techniques well-established in the field, the authors demonstrate both 1. that spin current of this configuration can be transmitted, and 2. that it can be used to switch the magnetization direction of a prototypical ferromagnet device with PMA. While there have been many studies on the effects of crystalline symmetry on the material properties of complex oxides, this work represents a very nice application of these principles to the field of spin-orbit torques.

The methodology is thorough, with a significant amount of supporting measurements included in the supplementary information. The authors explain very clearly for a broader audience the significance of the different symmetries, numerical methodologies, and the significance of the different torque components (field-like, damping-like, and in different orientations) extracted from the measurements. They also clearly explain the modelling and fitting so that others can reproduce the work.

I have a few minor suggestions and questions:

1. The authors have a very nice discussion and diagrams of the crystalline symmetries which are broken by the relaxation of the octahedral rotation pattern. However, besides orthorhombic materials, many cubic or tetragonal materials undergo strain relaxation causing a change in the crystalline symmetry through the film (e.g. change in lattice parameters). Would this type of broken symmetry still forbid a perpendicular spin current polarization, or would the current be too small in comparison to the other components? Can the authors comment on why this type of broken symmetry would not yield similar results?
2. When discussing the MOKE results in the text, the authors say that the pillar “turns white” before discussing the magnetization switching, which is confusing because the physical color of the material does not change with magnetization, and the actual colors used to plot the MOKE polarization is arbitrary.
3. The authors mention that the CaRuO<sub>3</sub> film becomes twinned as it relaxes, since the cubic structure of the substrate cannot prefer a direction for a vs. b. Is there any evidence for this in the STEM data? This results in isotropic behavior between the 110 and 1-10 axes in ST-FMR measurements, but is this also confirmed for the original resistivity measurements? What axis is the current direction for supplemental figure S5?
4. For the more general audience of Nature Communications who is unfamiliar with FMR measurements, I would suggest adding the magnetization/precession to the schematic in Fig

3a.

### Reviewer #2 (Remarks to the Author):

The authors have investigated the generation of spin currents in a symmetric quasi-perovskite CRO. This would be a novel attempt that has potential for application to devices, etc., depending on the development of future research. But I don't recommend this paper for the following reasons: I. suspicion of Joule heating generation due to the sample quality, II. possibility of ferromagnetism, III. few references on CRO properties.

#### I. Suspicion on Joule heating generation

The authors grown the CRO films under the low oxidation condition. It is thought to measure the electron diffusion due to Joule heat generated in the low-quality samples.

The defects in CRO film

The oxygen condition of 30 Pa in this study is insufficient even for smaller 1.5 J/cm<sup>2</sup> fluence [Daptary et al. (2017). *Physica B: Condensed Matter*, 511, 74-79.]. The large roughness and defects on surface were reported by AFM/SEM. Indeed, the upturn of resistivity at low temperature in this study is same as the reported behavior of CRO film grown under low oxidation condition. The electrical resistivity of the samples in this study is even higher. It has been reported that the difference in oxidation conditions causes differences in conduction.

The crystallinity of CRO film

As mentioned by the author as 'broad peak (line 110)', the FWHM of ~ 0.5 deg. is large as shown in out-of-plane XRD [Nair et al. (2018). *APL Materials*, 6(4).]. I don't agree with 'high crystalline quality (line 113)'. The broad XRD peak shows the disorder of the crystal and the possibility of impurities.

The low crystal quality causes to amounts of Joule heat, leading to misinterpretation on the measured voltage. High-grade samples with low electrical resistivity enable us to measure accurate voltage by high current to suppress Joule heat generation. The power of 15 dBm is so large for the small sample (Fig. 3). Pulse current of  $J_c = 7 \times 10^{10}$  A/m<sup>2</sup> is also large (Fig. 4). This is six orders of magnitude more than typical physical property measurements and is comparable to the gold breaking current. It is considered that electron diffusion due to Joule heating and its magnetic field effects appear.

Since CRO locates on the quantum critical region [Cao et al. (2008). *Solid State Communications*, 148(7-8), 305-309.], a little difference in growth conditions causes to a huge difference on conduction [Rao et al. (1997). *Applied physics letters*, 70(22), 3035-3037.]. It is noted that CRO compound can be accurately measured on high-quality and homogeneous samples.

#### II. Is CRO paramagnetic? (lines 23 and 67)

The (weak) ferro on CRO was reported in [Koriyama et al. (2004). *Journal of alloys and compounds*, 372(1-2), 58-64., Chen et al. (2010). *Applied Physics Letters*, 96(18)., Tripathi et al. (2014). *Scientific reports*, 4(1), 3877.]. I speculate that the properties in this report are originated from ferromagnetism.

#### III. Few references and their discussion of properties on CRO

The physical properties of CRO have been reported, but the authors do not discuss them.

- The STEM-HAADF and ABF observations (Fig. 1)

'the gradual change of octahedral tilt/rotation along the out-of-plane direction' was reported

in [Sakoda et al. (2023). *Advanced Electronic Materials*, 2201312.]. This figure contains a small amount of new information, therefore is not sufficient worth to publish.

- The band structure (Fig. 2)

The Fermi surface of CRO was clarified by ARPES [Liu et al. (2018). *Physical Review B*, 98(4), 041110.] and SdH effect [Schneider et al. (2014). *Physical Review Letters*, 112(20), 206403.]. Focusing on the Fermi energy in Fig. 2d, the convincing reason is required to explain the difference against the experimental fact.

Minor comments

'Pane' in lines 21, and 49.

The references of 1 and 7 are same.

No crystal axes in Fig2b and FigS2b.

### **Reviewer #3 (Remarks to the Author):**

In this manuscript, the authors demonstrate field-free switching of perpendicular magnetization via spin-orbit torque. The device consists of a CRO film with ferromagnetic CoFeB and exhibits a low switching current density. Overall, the experiments are systematically executed with a reasonable theory. The results of this manuscript are interesting and informative, but the paper requires more explanations as follows.

- Besides SOT efficiency, the numerical value of the spin Hall angle or effective magnetic field is a more tangible parameter to estimate the spin characteristic of this material. In addition, a comparison of these parameters with a similar system should be helpful for evaluating this channel.
- In Fig. 4b, isn't Hex related to the switching current?
- In Fig. 4c and d, the grey colors correspond to +Mz and -Mz, respectively. I am wondering why the grey color does not represent the same direction. Additionally, for example, in Fig. 4c, I intuitively assume that the grey color may correspond to the in-plane direction of magnetization. If the magnetization is along the in-plane direction, which color is presented in the image?
- The curves are shifted for visualization in Fig. 4b. Including information about the baseline resistance in the caption would be helpful for readers.
- In the switching experiment shown in Fig. 4, the current is divided into two paths: the CRO channel and metallic multilayers. The portion of the current for each of the two paths should be clarified in the manuscript.
- On page 6, the authors explain that 'The influence of the Py/CRO interface is very limited...' This sentence may mislead readers because the authors describe an out-of-plane polarized spin current resulting from the relaxation of oxygen octahedral tilt/rotation near the interface.
- The experiment on the switching of perpendicular magnetization involves x- and y-direction polarized current, as well as z-direction polarized current. What are the relative values of these three terms?
- The authors claimed that a very low current density is required for switching. A comparison with other field-free systems is recommended.
- Please discuss the dot size effect and pulse width effect on critical switching current density.
- Please describe the role of Ti between CRO and CoFeB.

(Minor comments)

- In Fig. 3a, the arrowhead of the spin current ( $J_S$ ) may be obscured by other objects.
- In Fig. 4a, inserting the direction of Hex is helpful for readers to easily understand the experimental set-up.
- In addition to current density, information about the actual current itself in Fig. 4b may be helpful for future experiments conducted by others.
- The insertion of a scale bar or a description of dot size in the caption of Fig. 4c and d is recommended.

I will recommend this manuscript for publication if these issues are clearly addressed.

# Response Letter

## Reply to Reviewer #1

**General Comment:** *“The submitted manuscript, “Generation of out-of-plane polarized spin current by non-uniform oxygen octahedral tilt/rotation” is a very clear and thorough paper in which the authors are able to tune the structure of a metallic oxide, CaRuO<sub>3</sub>, in order to allow transmission of a spin current polarized out-of-plane – a configuration generally forbidden by crystalline symmetry. Materials with perpendicular magnetic anisotropy (PMA) have become favorable for spintronic devices due to their ability to scale to smaller lateral sizes. Using techniques well-established in the field, the authors demonstrate both 1. that spin current of this configuration can be transmitted, and 2. that it can be used to switch the magnetization direction of a prototypical ferromagnet device with PMA. While there have been many studies on the effects of crystalline symmetry on the material properties of complex oxides, this work represents a very nice application of these principles to the field of spin-orbit torques.*

*The methodology is thorough, with a significant amount of supporting measurements included in the supplementary information. The authors explain very clearly for a broader audience the significance of the different symmetries, numerical methodologies, and the significance of the different torque components (field-like, damping-like, and in different orientations) extracted from the measurements. They also clearly explain the modelling and fitting so that others can reproduce the work.”*

**Reply:** We thank the reviewer for the high evaluation of our work and pointing out the novelty and significance of our results.

**Comment 1:** *“The authors have a very nice discussion and diagrams of the crystalline symmetries which are broken by the relaxation of the octahedral rotation pattern. However, besides orthorhombic materials, many cubic or tetragonal materials undergo strain relaxation causing a change in the crystalline symmetry through the film (e.g. change in lattice parameters). Would this type of broken symmetry still forbid a perpendicular spin current polarization, or would the current be too small in comparison to the other components? Can the authors comment on why this type of broken symmetry would not yield similar results?”*

**Reply:** We thank the reviewer for the high evaluation of our symmetry analysis and the valuable comment. We agree with the reviewer that the strain relaxation can change crystal symmetry generally. The perpendicular spin current polarization will be forbidden due to some symmetry constrains, and the CRO system in this work is one of the best material candidates. Following the reviewer’s suggestion, we have performed a complete symmetry analysis.

First, we give a general symmetry analysis. The  $z$ -polarized spin current is forbidden by  $C_{nc}$ ,  $\widetilde{C}_{nc}$ ,  $M_c$ ,  $\widetilde{M}_c$ , and the coexistence of in-plane symmetries  $M_a$  and  $M_b$  ( $M_a$  can be substituted by  $\widetilde{M}_a$ ,  $C_{2a}$  or  $\widetilde{C}_{2a}$ ;  $M_b$  can be substituted by  $\widetilde{M}_b$ ,  $C_{2b}$  or  $\widetilde{C}_{2b}$ ), and some other crystalline symmetries. Here “ $\sim$ ” denotes the nonsymmorphic symmetries. Generally, the strain relaxation or change in lattice parameters could hardly break the symmetries  $C_{2c}$ ,  $M_a$ ,  $M_b$  and the nonsymmorphic symmetries without  $z$ -direction translation in bulk and films stacked along  $z$ -axis. The nonsymmorphic symmetries involving  $z$ -direction translation can be broken by the

45 nonuniformity of the strain or the change in lattice parameters along  $z$ -axis.

46

47 However, space groups which can yield such results of forbidden perpendicular spin current  
48 polarization, are quite limited. We have investigated the 3D space symmetry groups from No. 75 to  
49 No. 142 for tetragonal materials and from No. 195 to No. 230 for cubic materials. We found that  
50 only ( $P4_1$ ,  $P4_3$ ,  $P4_122$ ,  $P4_12_12$ ,  $P4_322$ ,  $P4_32_12$ ,  $P2_13$ ,  $Pa\bar{3}$ ,  $P4_132$ ,  $P4_332$ ,  $Fd\bar{3}m$ ,  $Fd\bar{3}c$ ) 12  
51 groups have nonsymmorphic symmetries with  $z$ -direction translation and satisfy other symmetry  
52 constraints among the 104 space groups. Tetragonal or cubic materials with these symmetry groups  
53 can be a potential source of  $z$ -direction polarized spin Hall current from symmetry breaking near  
54 the interface.

55

56 Second, we confirm on the concrete materials discussion. In bulk CRO, the perpendicular spin  
57 current polarization is forbidden by nonsymmorphic symmetries  $\widetilde{C}_{2b}$ ,  $\widetilde{C}_{2c}$ ,  $\widetilde{M}_b$  and  $\widetilde{M}_c$  involving a  
58 half-lattice translation along  $c$  (i.e.  $z$ ) direction, which would be obviously broken due to the  
59 nonuniform rotation and tilt of oxygen octahedra in the CRO films near the interfaces. The restore  
60 of these symmetries takes at least 18 unit cells from our experiments. It reveals that the materials  
61 with nonsymmorphic symmetries translated along  $z$  direction and none of other forbidding  
62 symmetries will be free of the symmetry constraints on the  $z$ -polarized spin Hall current under the  
63 strain relaxation or change in lattice parameters. Therefore, the CRO structure is a good system to  
64 generate perpendicular spin current polarization in thin films and heterostructures.

65

66 Usually, gradual strain relaxation occurs when the thickness of the films reaches several tens of  
67 nanometers, and amplitude of lattice constant changes caused by strain relaxation is relatively  
68 limited. So, it's hard to ensure the generation of obvious  $z$ -direction polarized spin current.  
69 Compared to the tetragonal or cubic materials, CRO has large oxygen-octahedral rotation/tilt angle.  
70 In the absence of strain relaxation, the obvious relaxation of oxygen octahedral occurs due to the  
71 coupling with substrate, which significantly regulates the Ru-O bond hybridization [Lee, J. *et al.*  
72 *Appl. Phys. Lett.* 117, 163906 (2020)]. Besides the satisfactory of symmetry constraints, large spin  
73 Hall effect requires that the material should have strong spin-orbit coupling effect and adequate  
74 density of states near the Fermi surface, which is shown in CRO from our DFT calculations. The  
75 above reasons enhance the perpendicular spin current polarization in CRO.

76

77 Following the valuable comment, we add more explanation on this point in the revised manuscript  
78 (Page 8, Line 298-309).

79

80 **Comment 2:** “When discussing the MOKE results in the text, the authors say that the pillar “turns  
81 white” before discussing the magnetization switching, which is confusing because the physical color  
82 of the material does not change with magnetization, and the actual colors used to plot the MOKE  
83 polarization is arbitrary.”

84 **Reply:** We thank the reviewer for pointing out the question. This measurement is based on  
85 background-subtracted MOKE. To enhance the contrast, the background in the whole image was  
86 subtracted, thus, the whole image in the initial state maintains the same color (grey) though the pillar  
87 area is in magnetic polarity state. In Figs. 4c and 4d, we initialize the magnetization to the  $+M_z$  state  
88 and  $-M_z$  state, respectively, and the images of the initial state are both grey after the background is

89 subtracted. When the magnetic polarity state changes, the color in pillar area changes accordingly,  
90 while the color outside the pillar area remains unchanged. Although the grey color does not represent  
91 the same magnetic polarity state, the  $-M_z$  state is always brighter than the  $+M_z$  state. This MOKE  
92 measurement method is widely used to characterize magnetic polarity state, for example the study  
93 in Liu, L. *et al.* Nat. Nanotechnol. 16, 277-282 (2021) and Davies, C.S. *et al.* Nature, 628, 540–544  
94 (2024).

95

96 Here, we further clarify the process of magnetization switching by MOKE measurement. The  
97 switching of magnetization has been confirmed by background-subtracted MOKE measurement in  
98 the manuscript. Fig. 4c shows the background-subtracted MOKE images of field-free SOT  
99 switching magnetization from  $+M_z$  state to  $-M_z$  state. We initialize the magnetization of the pillar  
100 structure to  $+M_z$  state by applying a saturation magnetic field along the  $+z$  direction and the initial  
101 contrast of image is grey after the background is subtracted. Then the external field is set back to  
102 zero, when a  $-10$  mA pulsed current is applied into the channel, the pillar area turns white totally,  
103 indicating that the magnetization has changed from the  $+M_z$  state to the  $-M_z$  state totally. After the  
104 application of the  $+10$  mA electric pulse, the pillar area turns back to grey, i.e. the magnetization  
105 turns back to the  $+M_z$  state. In order to confirm the process of magnetization switching, we initialize  
106 the magnetic moment to the  $-M_z$  state and the contrast is gray after the background is subtracted, as  
107 shown in Fig. 4d. The device takes the  $+M_z$  state after the electric pulse of  $+10$  mA, then turns back  
108 to the  $-M_z$  state after the  $-10$  mA electric pulse.

109

110 Considering the comments of the reviewer, we add the relative caption of MOKE measurement to  
111 help the audience to easily understand (Page 17, Line 576-578), and update the description of  
112 experimental results in the revised manuscript (Page 9, Line 341-353).

113

114 **Comment 3:** “The authors mention that the  $\text{CaRuO}_3$  film becomes twinned as it relaxes, since the  
115 cubic structure of the substrate cannot prefer a direction for a vs. b. Is there any evidence for this  
116 in the STEM data? This results in isotropic behavior between the  $[110]$  and  $[1\bar{1}0]$ -axes in ST-FMR  
117 measurements, but is this also confirmed for the original resistivity measurements? What axis is the  
118 current direction for supplemental figure S5?”

119 **Reply:** We agree that the STEM is a typical method for studying the microstructure of thin films,  
120 and several kinds of twinned domain structure can be recognized with the help of selected area  
121 electron diffraction (SAED) measurements. However, this kind of twinned domain structure in this  
122 CRO films results in same electron diffraction pattern, so it's hard to be recognized, which has been  
123 confirmed in the study of CRO structure by SAED measurements [Jiang, J. C. *et al.* J. Appl. Phys.  
124 89, 6365–6369 (2001); Jiang, J. C. *et al.* Appl. Phys. Lett. 72, 2963–2965 (1998)]. Thus, we measure  
125 the reciprocal space mappings (RSMs) for the (103) reflections of CRO films at different phi angles  
126 as shown in Fig. R1a. The (103) reflections of CRO films show a fourfold symmetry implying the  
127 twinned crystal domains, different from the twofold symmetry of orthogonal structure.

128

129 We further study the anisotropy between the  $[110]$  and  $[1\bar{1}0]$ -axes by resistivity measurements. The  
130 CRO (9 nm) films grown on LAO substrate were etched into devices which are along  $[110]$  and  
131  $[1\bar{1}0]$ -axes, respectively, as shown in Fig. R1b. The measurement results indicate that the resistivity  
132 along the  $[110]$  and  $[1\bar{1}0]$ -axes exhibits the same behavior and the upturn is at the same temperature



133 as shown in Fig. R1c. The difference of resistivity between the two axes is pretty small. The  
 134 resistivity measurements further confirm the isotropic behavior between the  $[110]$  and  $[1\bar{1}0]$ -axes.  
 135 The current direction is along one of  $[110]$  and  $[1\bar{1}0]$ -axes in fig. S7 of Supplemental Information.

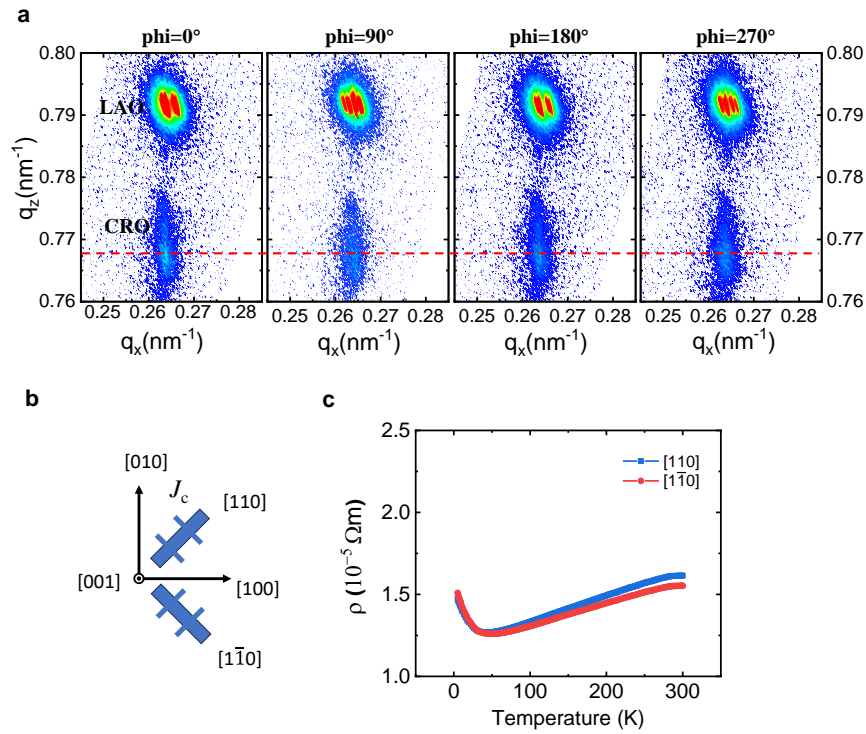

136 Fig. R1 a, Reciprocal space mappings (RSMs) for the (103) reflections of CRO film grown on LAO substrate at  
 137 different phi. The red dashed line marks the peak of CRO film. b, Schematic setup of devices along  $[110]$ -  
 138 axes, respectively. c, Four-terminal resistance as a function of temperature for CRO films along  $[110]$ -  
 139 axes, respectively.  
 140  
 141

142 The discussion of anisotropy resistivity measurements is added in the revised manuscript (Page  
 143 3, Line 123-126) and the figures is added in Section 3 of Supplementary Information.

144  
 145 **Comment 4:** “For the more general audience of Nature Communications who is unfamiliar with  
 146 FMR measurements, I would suggest adding the magnetization/precession to the schematic in Fig  
 147 3a.”

148 **Reply:** We thank the reviewer for the valuable suggestion. We update the schematic of ST-FMR  
 149 measurement in Fig. 3a in the revised manuscript, in which the magnetization and its precession  
 150 driven by damping-like torque are added as shown in Fig. R2.

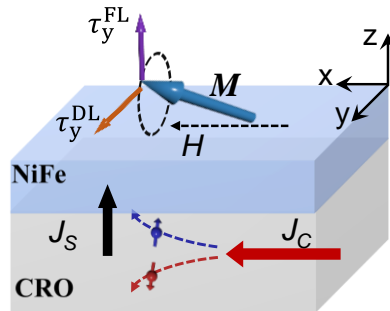

151  
 152 Fig. R2 Schematic of ST-FMR measurement with magnetization and precession.

153 [Reply to Reviewer #2](#)

154  
155 **General Comment:** *“The authors have investigated the generation of spin currents in a symmetric*  
156 *quasi-perovskite CRO. This would be a novel attempt that has potential for application to devices,*  
157 *etc., depending on the development of future research. But I don't recommend this paper for the*  
158 *following reasons: I. suspicion of Joule heating generation due to the sample quality, II. possibility*  
159 *of ferromagnetism, III. few references on CRO properties.”*

160  
161 **Reply:** We thank the reviewer for acknowledging that *“This would be a novel attempt that has*  
162 *potential for application to devices, etc., depending on the development of future research”*. For the  
163 concern on the three points, we perform additional experiments to further confirm our results and  
164 declare these questions. We wish that the reviewer can now be convinced and support the  
165 publication of our work in Nature Communications.

166  
167 **Comment 1:** *“I. Suspicion on Joule heating generation*  
168 *The authors grown the CRO films under the low oxidation condition. It is thought to measure the*  
169 *electron diffusion due to Joule heat generated in the low-quality samples.*

170  
171 *The defects in CRO film*  
172 *The oxygen condition of 30 Pa in this study is insufficient even for smaller 1.5 J/cm<sup>2</sup> fluence*  
173 *[Daptary et al. (2017). Physica B: Condensed Matter, 511, 74-79.]. The large roughness and defects*  
174 *on surface were reported by AFM/SEM. Indeed, the upturn of resistivity at low temperature in this*  
175 *study is same as the reported behavior of CRO film grown under low oxidation condition. The*  
176 *electrical resistivity of the samples in this study is even higher. It has been reported that the*  
177 *difference in oxidation conditions causes differences in conduction.*

178  
179 *The crystallinity of CRO film*  
180 *As mentioned by the author as 'broad peak (line 110)', the FWHM of ~ 0.5 deg. is large as shown in*  
181 *out-of-plane XRD [Nair et al. (2018). APL Materials, 6(4)]. I don't agree with 'high crystalline*  
182 *quality (line 113)'. The broad XRD peak shows the disorder of the crystal and the possibility of*  
183 *impurities.*

184  
185 *The low crystal quality causes to amounts of Joule heat, leading to misinterpretation on the*  
186 *measured voltage. High-grade samples with low electrical resistivity enable us to measure accurate*  
187 *voltage by high current to suppress Joule heat generation. The power of 15 dBm is so large for the*  
188 *small sample (Fig. 3). Pulse current of  $J_c = 7 \times 10^{10} \text{ A/m}^2$  is also large (Fig. 4). This is six orders of*  
189 *magnitude more than typical physical property measurements and is comparable to the gold*  
190 *breaking current. It is considered that electron diffusion due to Joule heating and its magnetic field*  
191 *effects appear.*

192  
193 *Since CRO locates on the quantum critical region [Cao et al. (2008). Solid State Communications,*  
194 *148(7-8), 305-309.], a little difference in growth conditions causes to a huge difference on*  
195 *conduction [Rao et al. (1997). Applied physics letters, 70(22), 3035-3037.]. It is noted that CRO*  
196 *compound can be accurately measured on high-quality and homogeneous samples.”*

197

198 **Reply:** We agree that spin current can just be accurately measured on high-quality and homogeneous  
199 samples, thus, the crystal quality is further characterized. In addition, the contribution of Joule  
200 heating in ST-FMR measurements as well as the temperature rise due to Joule heating in SOT  
201 switching are analyzed.

202

### 203 **Crystal quality of CRO films**

204 The environment of the cavity varies among different pulsed laser deposition, so it is necessary to  
205 directly characterize the quality of the CRO films. In order to reduce the defects, the CRO films are  
206 cooled to room temperature in an oxygen pressure of 100 Pa after deposition. From the atomic force  
207 microscope (AFM) image of CRO films shown in Fig. R3a, we can see that CRO films have good  
208 quality. **The RMS (root mean square) surface roughness extracted from the image is about 0.4**  
209 **nm**, indicating that CRO films in this study have lower surface roughness compared to the  
210 referenced results (0.8 nm) of CRO films grown under high oxidation condition [Daptary. G. N. *et*  
211 *al.* Physica B Condens. Matter 511, 74-79, (2017)].

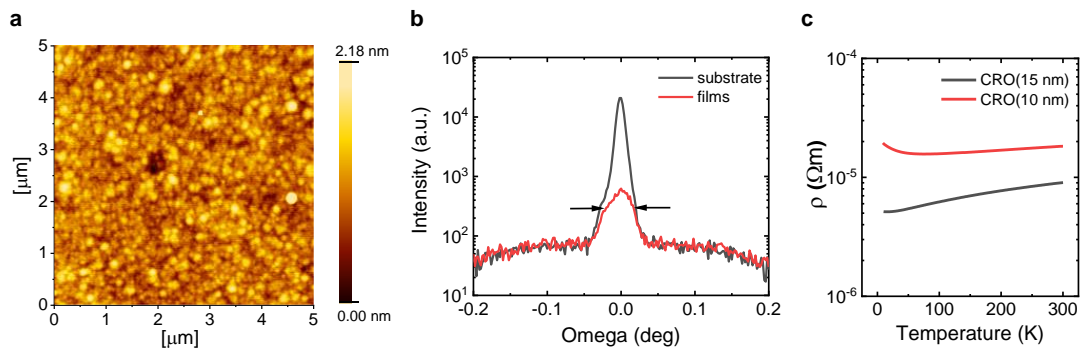

212

213 Fig. R3 a, Atomic force microscope (AFM) image of CRO films, b, Rocking curve of CRO (10 nm) films grown on  
214 LAO substrate. c, Resistivity of the CRO films with different thickness as a function of temperature.

215

216 The peak of CRO films in XRD spectrum broadens under the strain from substrate, and the full  
217 width at half maximum (FWHM) is about 0.5 deg which is comparable to the referenced results (0.4  
218 deg) of CRO films [Nair, H. P. *et al.* APL Mater. 6, 046101 (2018)]. The XRD spectrum of CRO  
219 films usually possesses a broadening about 0.5 deg, which can ensure the crystallinity [Daptary. G.  
220 N. *et al.* Physica B Condens. Matter 511, 74-79, (2017)]. Further, the rocking curve is measured to  
221 characterize the quality of CRO (10 nm) films as shown in Fig. R3b, **and the FWHM is about 0.03**  
222 **deg which is also comparable to the referenced results (0.02 deg) of CRO films** [Nair, H. P. *et*  
223 *al.* APL Mater. 6, 046101 (2018)]. Furthermore, the broadening of the rocking curve is within that  
224 of substrate, indicating a good crystallinity. The low intensity and broadening of curves are due to  
225 the smaller thickness of the films (10 nm) compared to the referenced results (32 nm). The AFM  
226 image and XRD spectrum confirm that CRO films is fabricated under proper conditions.

227

228 Generally, the resistivity of the CRO films is closely related to the thickness, the CRO films with  
229 thickness of 10 nm shows a small upturn in resistivity, while, the resistivity persists metallic  
230 behavior when the thickness increases to 15 nm as shown in Fig. R3c. Thus, the upturn behavior  
231 cannot be attributed to the low oxidation condition. The dependence of resistance on thickness in  
232 Fig. R3c is consistent with the reported results [Ali, Z. *et al.* npj Quantum Mater. 7, 108 (2022)].

233 Therefore, the CRO films is homogeneous and have good crystallinity.

234

235 The analysis of crystal quality is added in Section 1 of Supplementary Information, and the  
236 corresponding discussion is added in the revised manuscript (Page 3, Line 115-117).

237

### 238 Contribution of Joule heating effect in SOT efficiency

239 We thank the reviewer for insightful advice about whether the microwave power of 15 dBm is large  
240 for Joule heating effect in ST-FMR devices. As mentioned in Kondou, K. *et al.* Nat. Phys. 12, 1027–  
241 1031 (2016), **the linear relationship between the appropriate power and symmetric component**  
242 **of ST-FMR signal can ensure the correctness of the shape of the ST-FMR curves, thus**  
243 **eliminating the influence of thermal effect induced by microwave power.** To further exclude  
244 Joule heating effect from microwave power, we have measured the microwave-power-dependent  
245 ST-FMR signal in the CRO/Py device at 5 GHz from 9 to 19 dBm (as shown in Fig. R4a). As the  
246 power increases, the voltage of the symmetric component  $V_S$  in our device varies linearly with the  
247 power, which demonstrates the magnetization precession is in the linear regime (from 9 to 16 dBm).  
248 And deviate from linearity at higher power (from 17 to 19 dBm), which implies Joule heating effect  
249 from higher microwave power. **The ST-FMR measurement for SOT efficiency is under the**  
250 **power of 15 dBm without obvious Joule heating effect, thus the SOT efficiency can be**  
251 **accurately determined.**

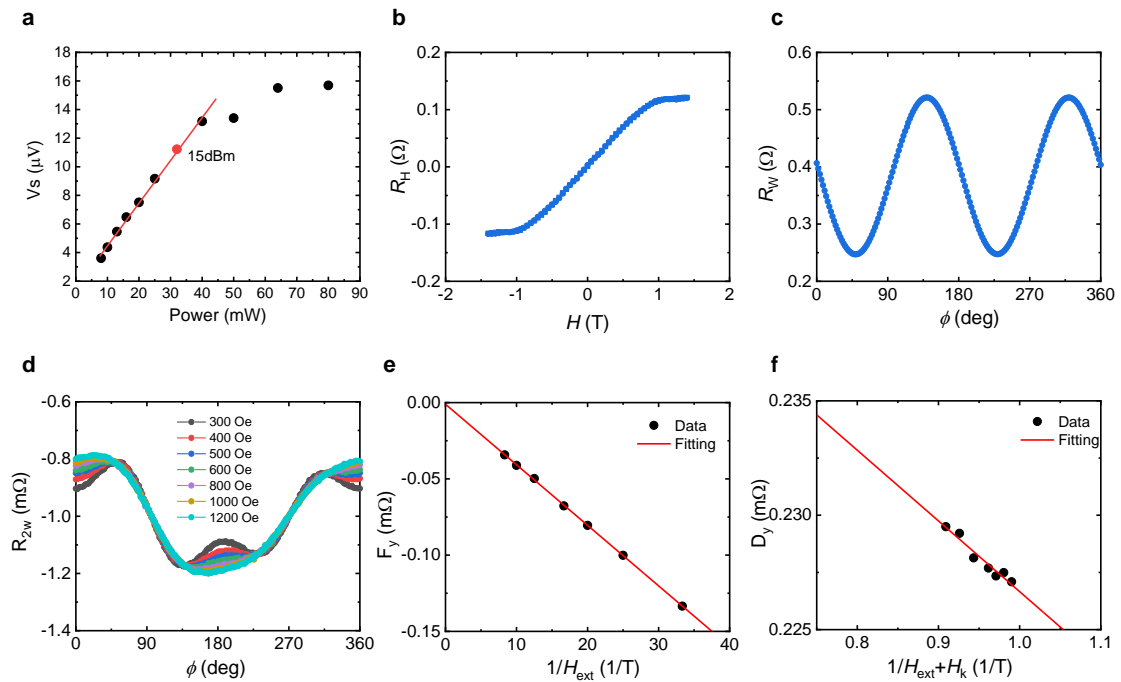

252

253 Fig. R4 a, Microwave power dependence of  $V_S$  extracted from the ST-FMR signals. b, Perpendicular magnetic field  
254 dependence of the Hall resistance ( $R_H$ ). c, First harmonic Hall resistance ( $R_{\omega}$ ) as a function of in-plane rotation angle  
255  $\phi$ . d, Second harmonic Hall resistance ( $R_{2\omega}$ ) as a function of in-plane rotation angle  $\phi$ , under different external  
256 magnetic field. e-f, Linear plot of  $F_y$  against  $1/H_{\text{ext}}$  (e) and  $D_y$  against  $1/H_{\text{ext}} + H_k$  (f).

257

258 In order to further distinguish the influence of the Joule heating on SOT efficiency measurement,  
259 we perform the second harmonic measurements which can separate the voltages from spin Hall  
260 effect and Joule heating effect. Actually, the Joule heating can cause spin current between the layers,

261 inducing additional resonant voltage signals, which exhibit a dependence on the angle of an in-plane  
 262 magnetic field in the ST-FMR measurement that is identical to the signal from the SOT. The Py/CRO  
 263 heterostructure is patterned into Hall bars with a width of 20  $\mu\text{m}$ . An ac current with frequency of  
 264 1.33 KHz is injected into the Hall bar, the current densities in CRO films is  $2.57 \times 10^5 \text{ A/cm}^2$ . The  
 265 first ( $R_w$ ) and second ( $R_{2w}$ ) harmonic Hall voltages are measured using lock-in as a function of the  
 266 external magnetic field angle as show in Figs. R4c and R4d, respectively. The SOT torque can be  
 267 separated from the  $\phi$  dependence voltage signals using following equation:

$$268 \quad R_{2w} = F_y(2\cos^3\phi - \cos\phi) + D_y\cos\phi + R_{ther}\sin2\phi \quad (1)$$

269 with

$$270 \quad F_y = 2R_{PHE} \frac{H_y^{FL} + H_O}{H_{ext}} \quad (2)$$

$$271 \quad D_y = R_{AHE} \frac{H_y^{DL}}{H_{ext} - H_K} + R_{ANE} \quad (3)$$

272 Where  $D_y$  term consists of the contributions from both the damping-like torque coefficients  
 273 generated by the spin Hall effect and the anomalous Nernst effect ( $R_{ANE}$ );  $F_y$  term is the  
 274 superposition of field-like torque and Oersted field counterparts ( $y$  represents the direction of  
 275 polarization). The  $R_{ther}$  term has been removed during data processing, which is likely to arise from  
 276 a thermal gradient along the direction of current. The  $H_y^{DL}$  is y-polarized damping-like torque  
 277 effective fields. The  $H_y^{FL}$  and  $H_O$  are y-polarized field-like torque effective fields and Oersted field,  
 278 respectively.  $R_{AHE}$  is the coefficient of the peak anomalous Hall voltage as shown in Fig. R4b.  $R_{PHE}$   
 279 is the coefficient of the peak planar Hall effect voltage for the given amplitude of alternating current  
 280 as shown in Fig. R4c.  $H_{ext}$  is external magnetic field and  $H_K$  characterizes the magnetic anisotropy.  
 281 The  $H_y^{FL} + H_O$  derived from linear fitting is 0.145 Oe indicating that field-like torque effective fields  
 282 are pretty small as shown in Fig. R4e. The  $D_y$  against  $\frac{1}{H_{ext} - H_K}$  is plotted to extract the  $H_y^{DL}$  from the

283 gradient of the linear fit as shown in Fig. R4f. The good linear relation for the  $D_y$  against  $\frac{1}{H_{ext} - H_K}$  is  
 284 the direct evidence of a sizable damping-like torque. The torque efficiencies per unit electric field  
 285 associated are:

$$286 \quad \xi_{y,z}^{DL} = \frac{2eH_{y,z}^{DL}m_s}{\hbar J} \quad (4)$$

287 where  $J$  is the current density in the CRO layer,  $m_s$  is the saturation magnetization of the Py layer.  
 288 **We find  $\xi_y^{DL}=1.2$  at room temperature which is close to the efficiency from ST-FMR**  
 289 **measurements (1.4). Thus, the SOT from spin Hall effect is dominant and Joule heating only**  
 290 **contributes a small portion.**

291

292 The analysis of Joule heating effect in SOT efficiency is added in Section 9 of Supplementary  
 293 Information, and the corresponding discussion is added in the revised manuscript (Page 6, Line 231-  
 294 238).

295

### 296 **Joule heating effect analysis for SOT switching measurement**

297 As considered by the reviewer, a temperature rise is likely to be generated due to the Joule heating  
 298 effect when the current flows through the Hall bar. Therefore, it is necessary to calibrate the instant  
 299 device temperature at the switching point. We measure the resistance of device as a function of

300 temperature, for which a tiny dc current 10  $\mu\text{A}$  is applied to avoid heating effect. As shown in Fig.  
 301 R5a, a linear dependence is obtained. Then, we measure the exact resistance when applying pulsed  
 302 current as shown in Fig. R5b. The pulsed current with density of  $6.3 \times 10^{10} \text{A/m}^2$  gives a resistance of  
 303 1150  $\Omega$ , and the instant device temperature is determined to be 354 K.

304

305 We further analyze the impact of temperature rise on the PMA layer. The anomalous Hall resistance  
 306 curves versus out-of-plane magnetic field under different temperature are measured as shown in Fig.  
 307 R5c. The CoFeB ferromagnetic layer is below the Curie temperature and maintains perpendicularly  
 308 ferromagnetic when the temperature is 350 K. In addition, the coercive field decreases when the  
 309 temperature rises, which result in the decrease of magnetic anisotropic energy. Thus, the critical  
 310 current density will be slightly reduced with the assistance of Joule heating [Zhu, L. Adv. Mater. 35,  
 311 2300853 (2023)]. **However, the switching of perpendicular magnetization cannot be achieved**  
 312 **solely by Joule heating, and the in-plane effective field from  $z$ -polarized spin current from**  
 313 **CRO films is necessary for field-free switching of perpendicular magnetization.**

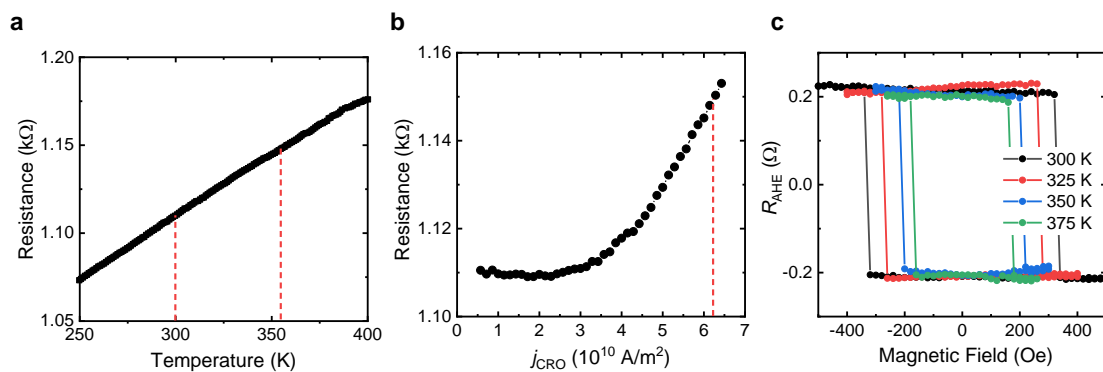

314

315 Fig. R5 a, Resistance of device as a function of temperature. b, Resistance of device as a function of the pulsed  
 316 current density. c, Anomalous Hall resistance curves versus out-of-plane magnetic field under different temperature.

317

318 In summary, the CRO films are of high quality and homogeneous, and the SOT efficiency can be  
 319 accurately determined. The Joule heating effect just leads to the increase of temperature and CoFeB  
 320 still maintains perpendicularly ferromagnetic when the pulsed current is applied in CRO films. Thus,  
 321 SOT plays a dominant role in the switching of magnetic moments, and switching cannot be achieved  
 322 solely by Joule heating.

323

324 Considering the necessity of Joule heating effect analysis in spin current research, we add the related  
 325 study of temperature rise at the switching point in Section 18 of Supplementary Information, the  
 326 corresponding discussion is added in the revised manuscript (Page 9, Line 336-339).

327

328 **Comment 2:** “Is CRO paramagnetic? (lines 23 and 67)

329 *The (weak) ferro on CRO was reported in [Koriyama et al. (2004). Journal of alloys and compounds,*  
 330 *372(1-2), 58-64., Chen et al. (2010). Applied Physics Letters, 96(18), Tripathi et al. (2014).*  
 331 *Scientific reports, 4(1), 3877.]. I speculate that the properties in this report are originated from*  
 332 *ferromagnetism.”*

333 **Reply:** As considered by the reviewer, ferromagnetism does indeed lead to spin currents with out-  
 334 of-plane polarization, we further analyze the magnetism of CRO films by Squid-VSM

335 measurements.

336 Zero-field-cooled (ZFC) and field-cooled (FC) magnetization curves taken after cooling the sample  
337 without applying a magnetic field and while cooling the sample in an applied magnetic field with  
338 1000 Oe were measured, respectively. The curves of magnetization versus temperature ( $M-T$ )  
339 coincide very well for the FC and ZFC measurements down to 10 K as shown in Fig. R6a. The  
340 increase of magnetic moment with the decrease of temperature comes from the LAO substrate.

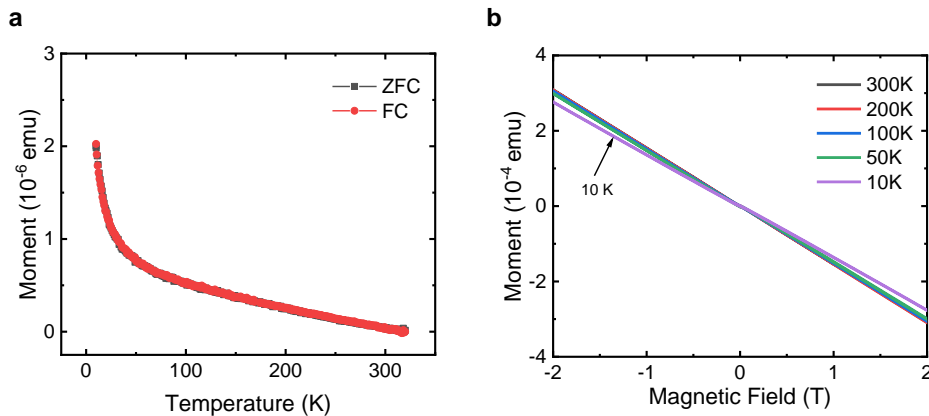

341

342 Fig. R6 a, Zero-field-cooled (ZFC) and field-cooled (FC) magnetization versus temperature plots for CRO (10 nm)  
343 films grown on LAO substrate. b, Magnetic-field dependence of magnetization for CRO films measured at different  
344 temperatures.

345

346 The curves of magnetization versus field ( $M-H$ ) show almost linear field dependence from 50 K to  
347 300 K as shown in Fig. R6b, suggesting that CRO films are paramagnetic. At 10 K, the  $M-H$  curve  
348 shows a slightly curvature under lower magnetic fields, indicating the existence of possible  
349 magnetic at low temperatures. Our measurement results are consistent with the published results  
350 referenced by reviewer that CRO films exhibit ferromagnetism at low temperatures. Due to the fact  
351 that both ST-FMR and switching measurements are performed at room temperature, it can be  
352 excluded that out-of-plane polarized spin currents originate from ferromagnetism.

353

354 The magnetization measurements are added in Section 11 of Supplementary Information and  
355 corresponding discussion is added in the revised manuscript (Page 6, Line 243-252).

356

357 **Comment 3:** “Few references and their discussion of properties on CRO

358 *The physical properties of CRO have been reported, but the authors do not discuss them.*

359 • *The STEM-HAADF and ABF observations (Fig. 1)*

360 *‘the gradual change of octahedral tilt/rotation along the out-of-plane direction’ was reported in*  
361 *[Sakoda et al. (2023). Advanced Electronic Materials, 2201312.]. This figure contains a small*  
362 *amount of new information, therefore is not sufficient worth to publish.”*

363 **Reply:** We thank reviewer for this comment and providing this reference, but we have to emphasize  
364 that the engineering mechanism of the crystal structure and the corresponding change trend in  
365 octahedral tilt/rotation in our manuscript are exactly different from those of the reference. The  
366 comparison and discussion are presented in details as below.

367

- 368 1. **The gradual change of octahedral tilt/rotation can be attributed to the symmetry**  
 369 **mismatch and coupling with substrate in our study, while it results from the tensile strain**  
 370 **and growth conditions in the reference.** In the reference, the CRO films are grown on  
 371 NdGaO<sub>3</sub> substrate which possesses orthorhombic structure and oxygen octahedral tilt/rotation  
 372 same as bulk CRO materials. The growth conditions of Ca/Ru element ratio and the tensile  
 373 strain from NdGaO<sub>3</sub> substrate regulate the structure of CRO films, further the relaxation of  
 374 strain results in the gradual change of octahedral tilt/rotation. In our study, we constructed the  
 375 symmetry-mismatched heterostructure by fabricating CRO films on LAO substrate which  
 376 possesses cubic structure without octahedral tilt/rotation. Due to the mismatch and coupling  
 377 with substrate, the octahedral tilt/rotation of CRO films is engineered near the interface. Based  
 378 the comparison, we can conclude that the origins of gradual change in octahedral tilt/rotation  
 379 are totally different.
- 380 2. **The corresponding trends of gradual change in octahedral tilt/rotation are opposite in**  
 381 **these two cases.** In the reference, the CRO films show large tilt angle near the interface, and  
 382 the tilt angle decreases when the CRO films are away from the interface as shown in Fig. R7a.  
 383 However, in our study, the tilt angle is about zero when CRO films near substrate and increases  
 384 when CRO films are away from substrate as shown in Fig. R7b. In addition, the gradual change  
 385 of octahedral tilt/rotation in our manuscript sustains larger thickness. Therefore, the gradual  
 386 change of octahedral tilt/rotation in CRO/LAO are different from that in CRO/NdGaO<sub>3</sub>  
 387 heterostructure.

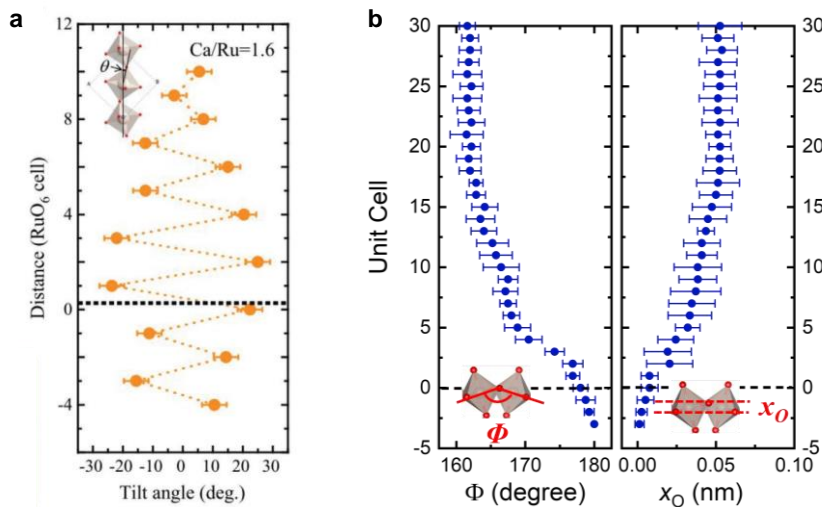

388 Fig. R7 a, Tilt angle as a function of the CRO layer in Figure 5f from this reference [Sakoda et al. (2023). Advanced  
 389 Electronic Materials, 2201312.]. b, Averaged Ru-O-Ru bond angle  $\Phi$  plotted as a function of the pseudo-cubic CRO  
 390 layer from our manuscript.  
 391

392 Beyond the two points above from the perspective of structure, it is also noteworthy that we firstly  
 393 investigate the out-of-plane spin current originated from the gradual change of octahedral  
 394 tilt/rotation and realize field-free magnetization switching based on this spin current, which are not  
 395 implemented in the reference.  
 396

397 In summary, in order to better display the gradual change of octahedral tilt/rotation and illustrate the  
 398 mechanism of engineering crystal symmetry, we believe that the STEM-HAADF and ABF  
 399



400 observations in Fig. 1 provides new information and is necessary in our study. Meanwhile, we also  
 401 agree that the reference provides the mechanism and corresponding results of regulating crystal  
 402 structure, and we are sorry for not citing this reference. This reference and related discussion are  
 403 added in the revised manuscript (Page 3, Line 108-113).

404

405 **Comment 4:** “The band structure (Fig. 2)

406 *The Fermi surface of CRO was clarified by ARPES [Liu et al. (2018). Physical Review B, 98(4),*  
 407 *041110.] and SdH effect [Schneider et al. (2014). Physical Review Letters, 112(20), 206403.].*  
 408 *Focusing on the Fermi energy in Fig. 2d, the convincing reason is required to explain the difference*  
 409 *against the experimental fact.”*

410 **Reply:** We thank the reviewer for these valuable suggestions.

411 Firstly, we discuss the Fermi surface. In Fig R8, we compare the Fermi surfaces from our  
 412 calculations with the experimental ARPES spectra [Liu et al. Physical Review B, 98(4), 041110  
 413 (2018)] within the first BZ.

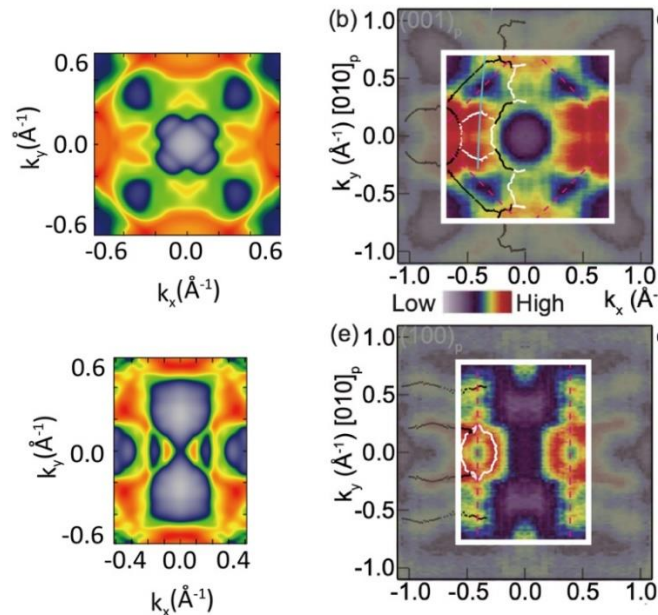

414

415 Fig. R8. (Left panels) Our simulated surface state spectrum at Fermi energy in first BZ. (Right panels) The  
 416 experimental ARPES spectra from Fig 2(b) and (e) in Ref. [Liu, Y. *et al.* Phys. Rev. B, 98, 041110 (2018)]. The  
 417 corresponding areas in the first BZ are marked with white boxes.

418

419 For both the (001) and the (100) surfaces, one can observe that our simulated surface states spectrum  
 420 at the Fermi energy exhibit small pockets. And these small pockets locate at the similar positions as  
 421 the experimental ones (see right panels of Fig. R8 in white box areas). Therefore, **our calculations**  
 422 **are qualitatively consistent with the experimental results.**

423 Then we discuss the differences between our calculated band structures and the results shown in  
 424 references [Liu, Y. *et al.* Phys. Rev. B, 98, 041110 (2018); Schneider, M. *et al.* Phys. Rev. Lett. 112,  
 425 206403 (2014)]. This is mainly due to three different calculating conditions:

- 426 1. Spin degree of freedom. In our calculations, we include the spin degree of freedom, as well as  
 427 the spin-orbit coupling (SOC) effect, while the Schneider’s work and the Liu’s work treat the  
 428 CaRuO<sub>3</sub> as a spinless system. Since we focus spin polarized Hall effect, the SOC effect should  
 429 be considered.

- 430 2. Lattice parameters. In our calculations, we use the lattice parameters measured from our own  
431 samples, while the Schneider's work and the Liu's work all use the lattice parameters from  
432 reference [Zayak, A. T. *et al.* Phys. Rev. B 74, 094104 (2006)].
- 433 3. The type of the exchange-correlation functions in DFT. Our work and the Liu's work use the  
434 generalized gradient approximation (GGA), while the Schneider's work use the local-density  
435 approximation (LDA). In general, there is not much difference between the GGA and LDA  
436 methods, but GGA is more commonly used.

[Redacted]

437  
438 Fig R9. (Left panel) Our calculated band structures without consideration of spin, using the LDA functionals. The  
439 lattice parameters are from [Zayak, A. T. *et al.* Phys. Rev. B 74, 094104(2006)]. (Right panel) The band structures  
440 from Fig 8. in the Supplemental material of [Schneider, M. *et al.* Phys. Rev. Lett. 112, 206403 (2014)].

441  
442 According to their calculation conditions, we have well reproduced the band structures in the  
443 Schneider's work, as shown in Fig R9. The band structures in the Liu's work are not calculated on  
444 an experimental structure. But Liu claimed their results are in consistent with Ref. [Dang, H. T. *et al.*  
445 *Phys. Rev. Lett.* 115, 107003 (2015)], of which the calculations are performed on the  
446 experimental orthorhombic structure. We have well reproduced the band structures in the Dang's  
447 work, as shown in Fig R10.

[Redacted]

448  
449 Fig R10. (Left panel) Our calculated spinless band structures by using the GGA functional. The lattice parameters  
450 are from [Zayak, A. T. *et al.* Phys. Rev. B 74, 094104 (2006)]. (Right panel) The band structures from Fig 2(c) of  
451 [Dang, H. T. *et al.* Phys. Rev. Lett. 115 107003 (2015)].  
452

453 To sum up, our Fermi surface calculations are consistent with the experimental results. Our  
454 calculations are reliable and in good agreement with our experimental spin Hall results. The  
455 corresponding discussion of calculations results is added in the revised manuscript (Page 4, Line  
456 160-165).

457

458 **Minor comments**

459 *'Pane' in lines 21, and 49.*

460 *The references of 1 and 7 are same.*

461 *No crystal axes in Fig2b and FigS2b.*

462 **Reply:** We thank the reviewer for pointing out these typos. The word “pane” is corrected to “plane”  
463 in lines 21, and 49 in the revised manuscript.

464 We delete the reference 7 and further check the references in the revised manuscript.

465 The crystal axes are added in Fig. 2b and Fig. S4b, and the related figure is updated in the revised  
466 manuscript.

467

468

469 [Reply to Reviewer #3](#)

470

471 **General Comment:** “In this manuscript, the authors demonstrate field-free switching of  
472 perpendicular magnetization via spin-orbit torque. The device consists of a CRO film with  
473 ferromagnetic CoFeB and exhibits a low switching current density. Overall, the experiments are  
474 systematically executed with a reasonable theory. The results of this manuscript are interesting and  
475 informative, but the paper requires more explanations as follows. I will recommend this manuscript  
476 for publication if these issues are clearly addressed.”

477 **Reply:** We thank the reviewer for the high evaluation of our work and recommendation of  
478 publication of this manuscript in *Nature Communications*, the constructive suggestions from the  
479 reviewer will help us improve the quality of this manuscript.

480

481 **Comment 1:** “Besides SOT efficiency, the numerical value of the spin Hall angle or effective  
482 magnetic field is a more tangible parameter to estimate the spin characteristic of this material. In  
483 addition, a comparison of these parameters with a similar system should be helpful for evaluating  
484 this channel.”

485 **Reply:** We agree that effective magnetic field is a tangible parameter to estimate the spin  
486 characteristic, thus the second harmonic measurement is performed as shown in Fig. R11. The  
487 damping-like torque effective magnetic field is proportional to the slope of the linear plot of  $D_y$   
488 against  $1/H_{\text{ext}}+H_k$  and estimated to be  $10.5 \text{ Oe}/(10^{10} \text{ Am}^{-2})$ .

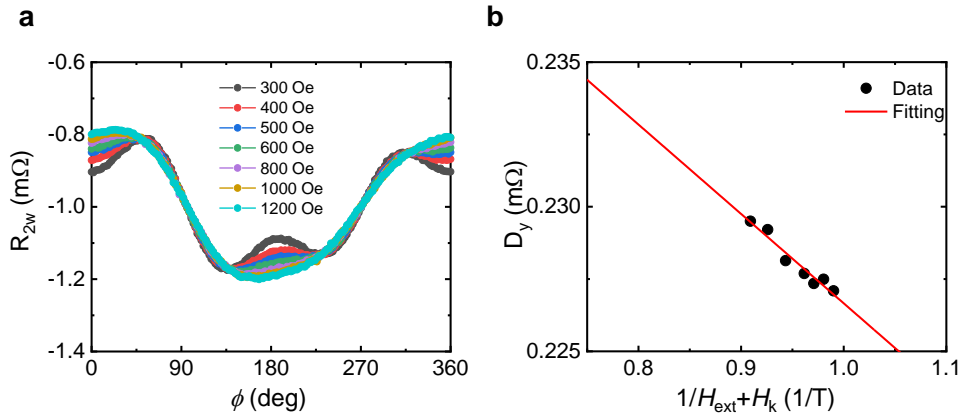

489

490 Fig. R11 a, Second harmonic Hall resistance ( $R_{2\omega}$ ) as a function of in-plane rotation angle  $\phi$ , under different external  
491 magnetic fields. b, Linear plot of  $D_y$  against  $1/H_{\text{ext}}+H_k$ .

492

493 According to the suggestion from the reviewer, we compare the parameters (i.e. effective magnetic  
494 field from second harmonic measurement and SOT efficiency from ST-FMR measurement) in a  
495 series of  $4d/5d$  transition oxides (Table 1).

496

497 It can be found in Table 1 that, due to the strong spin-orbit coupling,  $4d/5d$  transition oxides usually  
498 have a high efficiency for charge-spin interconversion. By comparing the effective magnetic field  
499 and SOT efficiency, we can see that the CRO films provide one of the largest efficiencies of charge-  
500 spin interconversion among  $4d/5d$  transition oxides. In addition to high SOT efficiency, CRO films  
501 can also provide in-plane effective fields for field-free switching of perpendicular magnetization,  
502 making it a competitive material for high-performance magnetic memory and spin logic.

503

504  
505

Table 1. Comparison of the effective magnetic field from second harmonic measurement and SOT efficiency from ST-FMR measurement of 4d/5d transition metal oxides from recent works.

| Year                 | Author                         | Heterostructures                                                         | thickness | effective field ( $/10^{10} \text{ Am}^{-2}$ )         | SOT efficiency ( $\hbar/2e$ ) | Temperature |
|----------------------|--------------------------------|--------------------------------------------------------------------------|-----------|--------------------------------------------------------|-------------------------------|-------------|
| this work            | Han, F. <i>et al.</i>          | CaRuO <sub>3</sub> /Py                                                   | 10 nm     | 10.5 Oe                                                | 1.4                           | 300 K       |
| 2023 <sup>[1]</sup>  | Li, S. <i>et al.</i>           | SrRuO <sub>3</sub> /Py<br>SrRuO <sub>3</sub> /CoPt                       | 20 nm     | 1.38 Oe ( $\theta=0.18$ )<br>3.96 Oe ( $\theta=0.21$ ) | —                             | 300 k       |
| 2023 <sup>[2]</sup>  | Li, P. <i>et al.</i>           | SrIrO <sub>3</sub> /CoFeB                                                | 10.8 nm   | 3.57 Oe                                                | 1.4                           | 300 K       |
| 2019 <sup>[3]</sup>  | Nan, T. <i>et al.</i>          | SrIrO <sub>3</sub> /Py                                                   | 20 nm     | —                                                      | 0.58                          | 300 K       |
| 2019 <sup>[4]</sup>  | Liu, L. <i>et al.</i>          | SrRuO <sub>3</sub> /SrIrO <sub>3</sub>                                   | 8 nm      | —                                                      | 0.86                          | 70 K        |
| 2019 <sup>[5]</sup>  | Everhardt, A. S. <i>et al.</i> | SrIrO <sub>3</sub> /Py                                                   | 13 nm     | —                                                      | 0.33                          | 300 K       |
| 2019 <sup>[6]</sup>  | Wang, H. <i>et al.</i>         | SrIrO <sub>3</sub> /Co <sub>1-x</sub> Tb <sub>x</sub>                    | 30 nm     | —                                                      | 1.1                           | 300 K       |
| 2019 <sup>[7]</sup>  | Ou, Y. <i>et al.</i>           | SrRuO <sub>3</sub> /Co                                                   | 10 nm     | —                                                      | 0.1 (300 K)<br>0.23 (60 K)    | 60-300 K    |
| 2016 <sup>[8]</sup>  | Wahler, M. <i>et al.</i>       | SrRuO <sub>3</sub> /La <sub>0.7</sub> Sr <sub>0.3</sub> MnO <sub>3</sub> | 1.2 nm    | —                                                      | 0.027                         | 190 K       |
| 2021 <sup>[9]</sup>  | Wei, J. <i>et al.</i>          | SrRuO <sub>3</sub> /Py                                                   | 6 nm      | —                                                      | 0.04-0.89                     | 300 K       |
| 2021 <sup>[10]</sup> | Zhou, J. <i>et al.</i>         | SrRuO <sub>3</sub> /Py                                                   | 20 nm     | —                                                      | 0.015-0.15                    | 300 K       |
| 2020 <sup>[11]</sup> | Bose, A. <i>et al.</i>         | IrO <sub>2</sub> /Ir/Py                                                  | 5 nm      | —                                                      | 0.65 (30 K)<br>0.08 (300 K)   | 30-300 K    |
| 2020 <sup>[12]</sup> | Ueda, K. <i>et al.</i>         | IrO <sub>2</sub> /Py                                                     | 7 nm      | —                                                      | 0.09                          | 300 K       |

506  
507  
508  
509  
510  
511

The comparison of the effective magnetic field and SOT efficiency of 4d/5d transition metal oxides are added in Section 10 of Supplementary Information, and the corresponding discussion is added in the revised manuscript (Page 6, Line 238-242).

**Comment 2:** “In Fig. 4b, isn't  $H_{ex}$  related to the switching current?”

512  
513  
514  
515

**Reply:** The switching current is indeed related to the  $H_{ex}$ . In order to confirm this regulation, we carry out a series of switching measurements, in which  $H_{ex}$  is increased from 0 Oe to -500 Oe as shown in Fig. R12.

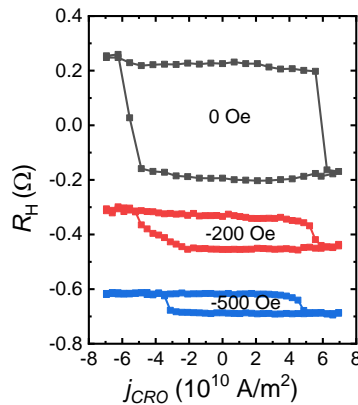

516  
517  
518

Fig. R12 Current-induced magnetization switching of Hall bars device when different in-plane magnetic fields (from 0 Oe to -500 Oe) are applied along the direction of the current. The loops are shifted for better visualization.

519 We can see that the switching current decreases obviously with this large field range. At the same  
520 time,  $R_H$  decreases correspondingly, which can be attributed to the decrease of the out-of-plane  
521 magnetic moment under the application of in-plane magnetic field. However, due to the small  
522 increment of magnetic field between -20 and 40 Oe in the manuscript, the change of critical  
523 switching current is not obvious.

524

525 **Comment 3:** *“In Fig. 4c and d, the grey colors correspond to  $+M_z$  and  $-M_z$ , respectively. I am*  
526 *wondering why the grey color does not represent the same direction. Additionally, for example, in*  
527 *Fig. 4c, I intuitively assume that the grey color may correspond to the in-plane direction of*  
528 *magnetization. If the magnetization is along the in-plane direction, which color is presented in the*  
529 *image?”*

530 **Reply:** We are sorry for not illustrating the method of MOKE measurement. This measurement is  
531 based on background-subtracted MOKE. To enhance the contrast, the background in the whole  
532 image was subtracted, and the whole image in the initial state maintains the same color (grey) though  
533 the pillar area is in magnetic polarity state. In Figs. 4c and 4d, we initialize the magnetization to the  
534  $+M_z$  state and  $-M_z$  state, respectively, and the images of initial state are both grey after the  
535 background is subtracted. Thus, the grey color does not represent the same direction. When the  
536 magnetic polarity state changes, the color in pillar area changes accordingly, while the color outside  
537 the pillar area remains unchanged. Although the grey color does not represent the same magnetic  
538 polarity state, the  $-M_z$  state is always brighter than the  $+M_z$  state. This MOKE measurement method  
539 is widely used to characterize magnetic polarity [Liu, L. *et al.* Nat. Nanotechnol. 16, 277-282 (2021);  
540 Davies, C.S. *et al.* Nature, 628, 540–544 (2024)].

541

542 The relative caption is added in the revised manuscript (Page 17, Line 576-578).

543

544 Same as the case of perpendicular magnetization, when the magnetization is along the in-plane  
545 direction, the magnetic polarity state is initialized to the grey color and the switching between the  
546 magnetic polarity state  $+M_y$  and  $-M_y$  is represented by contrast. For example, when the  $-M_y$  state  
547 is represented by grey color, the magnetization is switched to  $+M_y$  state and represented by dark  
548 color [Wang, Y. *et al.* Nat. Commun. 8, 1364 (2017); Shi, S. *et al.* Nat. Nanotechnol. 14, 945–949  
549 (2019)].

550

551 **Comment 4:** *“The curves are shifted for visualization in Fig. 4b. Including information about the*  
552 *baseline resistance in the caption would be helpful for readers.”*

553 **Reply:** We thank the reviewer for this suggestion. The baseline resistance of the loops is about 1.6  
554  $\Omega$ , which is generated by misalignment of contacts. To help with reading, the information about the  
555 baseline resistance is added in the caption in the revised manuscript (Page 17, Line 575).

556

557 **Comment 5:** *“In the switching experiment shown in Fig. 4, the current is divided into two paths:*  
558 *the CRO channel and metallic multilayers. The portion of the current for each of the two paths*  
559 *should be clarified in the manuscript.”*

560 **Reply:** We thank the reviewer for the suggestion. Here we clarify the portion of the current in  
561 different materials. For the Ta (2 nm)/MgO (2 nm)/CoFeB (Co<sub>20</sub>Fe<sub>60</sub>B<sub>20</sub>, 1.2 nm)/Ti (3 nm)/CRO (9  
562 nm) device shown in Fig. 4, the critical current is 9 mA. The resistivities of CRO (9 nm) and the

563 PMA structure CoFeB (1.2 nm)/Ti (3 nm) layers (the Ta layer will be oxidized in air), can be  
 564 obtained from standard four-probe measurements. We get the resistivity for each layer  $\rho_{CRO} =$   
 565  $1.1 \times 10^{-5} \Omega \cdot m$  and  $\rho_{PMA} = 4.7 \times 10^{-6} \Omega \cdot m$ . The width of CRO layers is  $16 \mu m$  and the PMA layers are  
 566 etched into round pillar with a diameter of  $10 \mu m$ .

567 The resistivity of round pillar PMA layers can be calculated as:

$$568 \quad R_{PMA} = \int_{-r}^r \frac{\rho_{PMA} dl}{s} = \frac{\pi \rho_{PMA}}{2t_{PMA}}$$

569 The critical current density by considering the parallel circuit model can be estimated as:

$$570 \quad I_{CRO} = I_{all} \frac{R_{PMA}}{R_{CRO} + R_{PMA}}$$

$$571 \quad = I_{all} \frac{\frac{\pi \rho_{PMA}}{2t_{PMA}}}{\frac{\rho_{CRO} l_{CRO}}{w_{CRO} \times t_{CRO}} + \frac{\pi \rho_{PMA}}{2t_{PMA}}}$$

$$572 \quad = 9 \text{ mA} \times \frac{\frac{\pi \times 4.7 \times 10^{-6} \Omega \cdot m}{2 \times 4.2 \text{ nm}}}{\frac{1.1 \times 10^{-5} \Omega \cdot m \times 10 \mu m}{16 \mu m \times 9 \text{ nm}} + \frac{\pi \times 4.7 \times 10^{-6} \Omega \cdot m}{2 \times 4.2 \text{ nm}}}$$

$$573 \quad = 6.3 \text{ mA}$$

$$574 \quad J_{CRO} = I_{CRO} \times \frac{1}{w_{CRO} \times t_{CRO}} = 6.3 \text{ mA} \times \frac{1}{16 \mu m \times 9 \text{ nm}} = 4.4 \times 10^{10} \text{ Am}^{-2}$$

575 Therefore, thirty percent portion of the current flows into the PMA structure, the contribution of  
 576 current induced torque from the Ti layer is negligible due to the extremely small spin Hall angle of  
 577 Ti [Du, C. *et al.* Phys. Rev. B 90, 140407 (2014)]. The critical current density for the field-free  
 578 switching is as low as  $4.4 \times 10^{10} \text{ Am}^{-2}$ , when considering the shunt effect.

579

580 The shunting effect is clarified in the revised manuscript (Page 9, Line 334-336) and the  
 581 corresponding calculation is added in Section 17 of Supplementary Information.

582

583 **Comment 6:** “On page 6, the authors explain that ‘The influence of the Py/CRO interface is very  
 584 limited...’ This sentence may mislead readers because the authors describe an out-of-plane  
 585 polarized spin current resulting from the relaxation of oxygen octahedral tilt/rotation near the  
 586 interface.”

587 **Reply:** We agree that this sentence “The influence of Py/CRO interface is very limited and CRO  
 588 layers still maintains high symmetry without lattice distortion” may mislead readers, thus, this  
 589 sentence is replaced by “The oxygen octahedral tilt/rotation keeps uniform in CRO layers near the  
 590 Py/CRO interface, and CRO layers still maintains high symmetry.” in the revised manuscript (Page  
 591 7, Line 261-262).

592

593 **Comment 7:** “The experiment on the switching of perpendicular magnetization involves x- and y-  
 594 direction polarized current, as well as z-direction polarized current. What are the relative values of  
 595 these three terms?”

596 **Reply:** The x-, y- and z-direction polarized spin current generated from CRO is analyzed by ST-  
 597 FMR measurement. The efficiencies of z-direction torque are determined to be 0.0086, which is  
 598 comparable to that generated from  $\text{WTe}_2$  [MacNeill, D. *et al.* Nat. Phys. 13, 300-305 (2017)] and  
 599  $\text{MnPd}_3$  [DC, M. *et al.* Nat. Mater. 22, 591–598 (2023)]. The z-direction polarized spin current

600 provides in-plane effective field for field-free switching. Since the  $x$ -direction damping-like torque  
 601 is forbidden by crystal symmetry and can be ignored, we mainly focus on the  $y$ - and  $z$ -direction  
 602 damping-like torque. The relative values of  $z$ - and  $y$ -direction torque, i.e.  $\theta_z^{DL}/\theta_y^{DL}$  is about 0.0062.  
 603 The spin-polarization canting angle in CRO films is sufficient for field-free deterministic switching  
 604 of perpendicular magnetization [Lee, DK. *et al.* Sci. Rep. 10, 1772 (2020)].

605  
 606 **Comment 8:** “The authors claimed that a very low current density is required for switching. A  
 607 comparison with other field-free systems is recommended.”

608 **Reply:** We thank the reviewer for the comment. We summarize the critical current density for field-  
 609 free switching in different heterostructures as shown in Table 1. We can see that CoFeB/CRO system  
 610 requires lower current density than most of heterostructures. Although the critical current density in  
 611 SrRuO<sub>3</sub>/SrIrO<sub>3</sub> heterostructure is smaller than that in CoFeB/CRO heterostructure, the working  
 612 temperature of SrRuO<sub>3</sub>/SrIrO<sub>3</sub> heterostructure is below room temperature. The comparison with  
 613 other field-free systems indicates the high efficiency of field-free switching perpendicular  
 614 magnetization in CoFeB/CRO system.

615  
 616 The corresponding discussion is added in the revised manuscript (Page 8, Line 332-334) and the  
 617 summary of critical current density in different heterostructures is added in Section 16 of  
 618 Supplementary Information.

619  
 620 Table 1. Summary of critical current density for field-free switching in different heterostructures.

| Year                 | Author                   | Heterostructures                                       | Critical current density<br>( $\times 10^{10} \text{Am}^{-2}$ ) | Temperature |
|----------------------|--------------------------|--------------------------------------------------------|-----------------------------------------------------------------|-------------|
| this work            | Han, F. <i>et al.</i>    | CaRuO <sub>3</sub> /CoFeB                              | 6.3                                                             | 300 K       |
| 2019 <sup>[2]</sup>  | Liu, L. <i>et al.</i>    | SrRuO <sub>3</sub> /SrIrO <sub>3</sub>                 | 4.6                                                             | 70 K        |
| 2022 <sup>[13]</sup> | Kao, IH. <i>et al.</i>   | WTe <sub>2</sub> /Fe <sub>2.78</sub> GeTe <sub>2</sub> | 9.8                                                             | 190 K       |
| 2023 <sup>[14]</sup> | Liu, Y. <i>et al.</i>    | TaIrTe <sub>4</sub> /CoFeB                             | 7.6                                                             | 300 K       |
| 2021 <sup>[15]</sup> | You, Y. <i>et al.</i>    | Mn <sub>3</sub> SnN/(Co/Pd) <sub>3</sub>               | 9                                                               | 300 K       |
| 2023 <sup>[16]</sup> | DC, M. <i>et al.</i>     | MnPd <sub>3</sub> /Co                                  | 11                                                              | 300 K       |
| 2021 <sup>[17]</sup> | Chen, X. <i>et al.</i>   | Mn <sub>2</sub> Au/(Co/Pd) <sub>3</sub>                | 55                                                              | 300 K       |
| 2022 <sup>[18]</sup> | Karube, S. <i>et al.</i> | RuO <sub>2</sub> /Co                                   | 30                                                              | 300 K       |
| 2021 <sup>[19]</sup> | Zheng, Z. <i>et al.</i>  | Co <sub>1-a</sub> Tb <sub>a</sub>                      | 9                                                               | 300 K       |
| 2016 <sup>[20]</sup> | Oh, YW. <i>et al.</i>    | IrMn/CoFeB                                             | 42                                                              | 300 K       |
| 2016 <sup>[21]</sup> | Lau, YC. <i>et al.</i>   | Pt/CoFe/Ru<br>/CoFe/IrMn                               | 20                                                              | 300 K       |

621  
 622  
 623 **Comment 9:** “Please discuss the dot size effect and pulse width effect on critical switching current  
 624 density.”

625 **Reply:** We thank the reviewer for the suggestion. In order to clarify the dot size effect, we fabricate  
 626 a series of samples, in which the PMA layers are etched into dots with diameters of 10  $\mu\text{m}$ , 5  $\mu\text{m}$  and  
 627 3  $\mu\text{m}$ , respectively. As the dot size reduces, the  $R_H$  value decreases accordingly. The perpendicular



628 magnetization can be switched by applying pulsed current as shown in Fig. R13a. In order to  
 629 compare the critical current density in devices with different dot sizes, the current in PMA layers is  
 630 extracted. The perpendicular magnetization is switched nearly at the same current density, so the  
 631 size of the dot has little effect on the density of critical switching current.

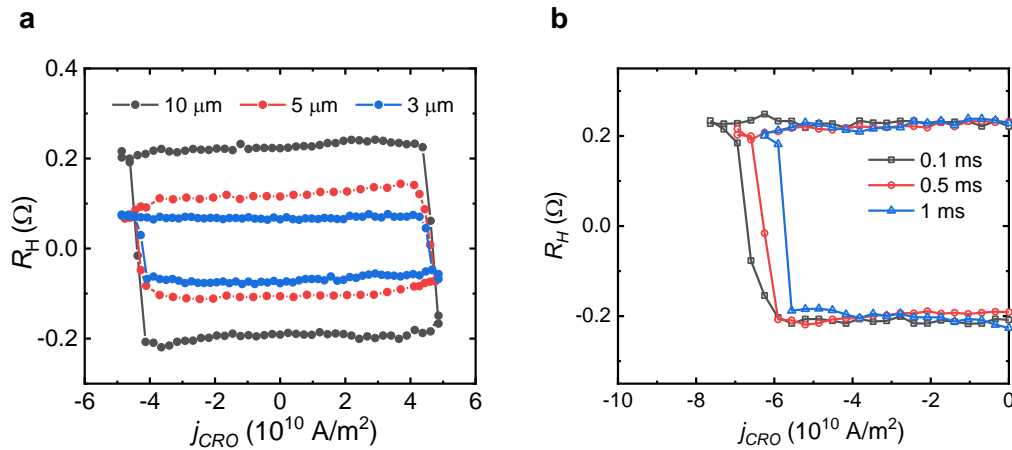

632  
 633 Fig. R13 a, Current-induced magnetization switching of the dot with different size. b, Current-induced magnetization  
 634 switching when pulsed current with different width is applied.

635  
 636 In order to analyze the pulse width effect on critical switching current density, we measure the  
 637 magnetization switching curves with different pulse widths as shown in Fig. R13b. When the pulse  
 638 width increases from 0.1 mA to 1 mA, the critical switching current density decreases, which can  
 639 be attributed to the increase of temperature due to the Joule heating. This behavior is consistent with  
 640 theoretical analysis [Diao, Z. *et al.* J. Phys., Condens. Matter, 19, 165209, (2007); Huai, Y. AAPPS  
 641 Bulletin December, 18, 6, (2008)].

642  
 643 **Comment 10:** “Please describe the role of Ti between CRO and CoFeB.”  
 644 **Reply:** The Ti layer was introduced to get perpendicularly magnetized CoFeB layers, and the SOT  
 645 contribution from the Ti layer is negligible due to the extremely small spin Hall angle of Ti [Du, C.  
 646 *et al.* Phys. Rev. B 90, 140407 (2014)]. Ti as a buffer layer is widely used to stabilize the  
 647 perpendicular magnetization of CoFeB layers [Liu, Y. *et al.* Nat. Electron. 6, 732–738 (2023); Cao,  
 648 C. *et al.* Nat. Commun. 14, 5873 (2023)].

649  
 650 The role of Ti layer is added in the revised manuscript (Page 8, Line 316-318).

651  
 652 **Minor comments**  
 653 - In Fig. 3a, the arrowhead of the spin current ( $J_S$ ) may be obscured by other objects.  
 654 - In Fig. 4a, inserting the direction of Hex is helpful for readers to easily understand the  
 655 experimental set-up.  
 656 - In addition to current density, information about the actual current itself in Fig. 4b may be helpful  
 657 for future experiments conducted by others.  
 658 - The insertion of a scale bar or a description of dot size in the caption of Fig. 4c and d is  
 659 recommended.

660 **Reply:** We thank the reviewer for these valuable suggestions. The arrowhead of the spin current in

661 Fig. 3a is updated in the revised manuscript and also shown in Fig. R14a.  
 662 The direction of  $H_{ex}$  in Fig. 4a is added in the revised manuscript and also shown in Fig. R14b.  
 663 The information about the actual current is added in the revised manuscript (Page 9, Line 330).  
 664 The scale bars in Figs. 4c and 4d are added as shown in Fig. R14c and the description of dot size in  
 665 the caption is added in the revised manuscript (Page 17, Line 573).

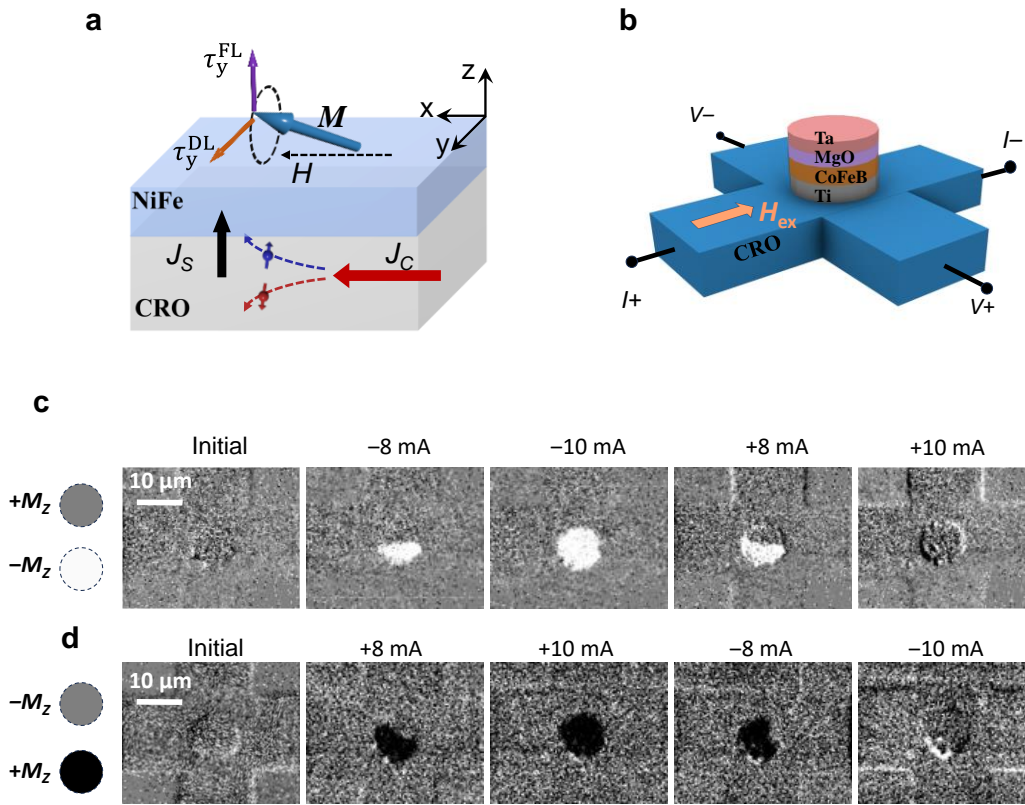

666  
 667 Fig. R14 a, Schematic of ST-FMR measurement in Fig. 3a of the manuscript. b, Schematic of the  
 668 Ta/MgO/CoFeB/Ti/CRO Hall bar device for switching measurements in Fig. 4a of the manuscript. c, MOKE images  
 669 of the field-free SOT induced magnetization switching in Fig. 4c of the manuscript.

670  
 671  
 672  
 673  
 674

## 675 References

- 676 1. Li, S. *et al.* Room temperature spin-orbit torque efficiency and magnetization switching  
 677 in SrRuO<sub>3</sub>-based heterostructures. *Phys. Rev. Mater.* **7**, 024418 (2023).
- 678 2. Li, P. *et al.* Large Spin-Orbit-Torque Efficiency and Room-Temperature Magnetization  
 679 Switching in SrIrO<sub>3</sub>/Co-Fe-B Heterostructures. *Phys. Rev. Appl.* **19**, 024076 (2023).
- 680 3. Nan, T. *et al.* Anisotropic spin-orbit torque generation in epitaxial SrIrO<sub>3</sub> by symmetry design.  
 681 *Proc. Natl. Acad. Sci. U.S.A.* **116**, 16186-16191 (2019).
- 682 4. Liu, L. *et al.* Current-induced magnetization switching in all-oxide heterostructures. *Nat.*  
 683 *Nanotechnol.* **14**, 939-944 (2019).
- 684 5. Everhardt, A. S. *et al.* Tunable charge to spin conversion in strontium iridate thin films. *Phys.*  
 685 *Rev. Mater.* **3**, 051201 (2019).

- 686 6. Wang, H. *et al.* Large spin-orbit torque observed in epitaxial SrIrO<sub>3</sub> thin films. *Appl. Phys. Lett.*  
687 **114**, 232406 (2019).
- 688 7. Ou, Y. *et al.* Exceptionally High, Strongly Temperature Dependent, Spin Hall Conductivity of  
689 SrRuO<sub>3</sub>. *Nano Lett.* **19**, 3663–3670 (2019).
- 690 8. Wahler, M. *et al.* Inverse spin Hall effect in a complex ferromagnetic oxide heterostructure. *Sci.*  
691 *Rep.* **6**, 28727 (2016).
- 692 9. Wei, J. *et al.* Enhancement of Spin-Orbit Torque by Strain Engineering in SrRuO<sub>3</sub> Films. *Adv.*  
693 *Funct. Mater.* **31**, 21000 (2021).
- 694 10. Zhou, J. *et al.* Modulation of Spin-Orbit Torque from SrRuO<sub>3</sub> by Epitaxial-Strain-Induced  
695 Octahedral Rotation. *Adv. Mater.* **33**, 2007114 (2021).
- 696 11. Bose, A. *et al.* Effects of Anisotropic Strain on Spin–Orbit Torque Produced by the Dirac Nodal  
697 Line Semimetal IrO<sub>2</sub>. *ACS Appl. Mater. Interfaces* **12**, 55411–55416 (2020).
- 698 12. Ueda, K. *et al.* Spin-orbit torque generation in NiFe/IrO<sub>2</sub> bilayers. *Phys. Rev. B* **102**(13), 134432  
699 (2020).
- 700 13. Kao, IH. *et al.* Deterministic switching of a perpendicularly polarized magnet using  
701 unconventional spin-orbit torques in WTe<sub>2</sub>. *Nat. Mater.* **21**, 1029–1034 (2022).
- 702 14. Liu, Y. *et al.* Field-free switching of perpendicular magnetization at room temperature using  
703 out-of-plane spins from TaIrTe<sub>4</sub>. *Nat. Electron.* **6**, 732–738 (2023).
- 704 15. You, Y. *et al.* Cluster magnetic octupole induced out-of-plane spin polarization in antiperovskite  
705 antiferromagnet. *Nat. Commun.* **12**, 6524 (2021).
- 706 16. DC, M. *et al.* Observation of anti-damping spin-orbit torques generated by in-plane and out-of-  
707 plane spin polarizations in MnPd<sub>3</sub>. *Nat. Mater.* **22**, 591–598 (2023).
- 708 17. Chen, X. *et al.* Observation of the antiferromagnetic spin Hall effect. *Nat. Mater.* **20**, 800–804  
709 (2021).
- 710 18. Karube, S. *et al.* Observation of Spin-Splitter Torque in Collinear Antiferromagnetic RuO<sub>2</sub>.  
711 *Phys. Rev. Lett.* **129**, 137201(2022).
- 712 19. Zheng, Z. *et al.* Field-free spin-orbit torque-induced switching of perpendicular magnetization  
713 in a ferrimagnetic layer with a vertical composition gradient. *Nat. Commun.* **12**, 4555 (2021).
- 714 20. Oh, YW. *et al.* Field-free switching of perpendicular magnetization through spin-orbit torque in  
715 antiferromagnet/ferromagnet/oxide structures. *Nat. Nanotech.* **11**, 878–884 (2016).
- 716 21. Lau, YC. *et al.* Spin-orbit torque switching without an external field using interlayer exchange  
717 coupling. *Nat. Nanotech.* **11**, 758–762 (2016).
- 718

## **REVIEWER COMMENTS**

### **Reviewer #2 (Remarks to the Author):**

There were a lot of speculation about the physical properties, but most of the corrections are significant. I guess that the additional experiments on Reviewer 2 require great deal of efforts. I thank to the authors for the attentive replies. Finally, I request a reconsideration of the comparison with the Fermi surfaces reported in ARPES.

In fig. R8 (right below [Liu, Y. et al. Phys. Rev. B, 98, 041110 (2018).]), you can see few FS in the 1st BZ. This is due to a property of ARPES. Maybe, Liu et al. are inadequately described. Precisely, we have to look at 'the FS in the 2nd BZ'. Here we see the two most characteristic cylindrical Fermi surfaces in the CRO. They are open only in the kz direction, giving a strong anisotropy to conduction. In such a highly anisotropic system, the current flows depend on the crystal orientation. The electronic structure must be compared to the band calculation and discussed in relation to the orientation of the measured current.

If the requested comparison with ARPES is reconsidered well, we believe it deserves to be published for 'Nature communications'. If the correction is achieved without problems, no further review by me would be necessary.

### **Reviewer #3 (Remarks to the Author):**

The issues I commented on are clearly addressed, so I recommend this manuscript for publication.

# Response Letter

## Reply to Reviewer #2

**Comment:** *There were a lot of speculation about the physical properties, but most of the corrections are significant. I guess that the additional experiments on Reviewer 2 require great deal of efforts. I thank to the authors for the attentive replies. Finally, I request a reconsideration of the comparison with the Fermi surfaces reported in ARPES.*

*In fig. R8 (right below [Liu, Y. et al. Phys. Rev. B, 98, 041110 (2018).]), you can see few FS in the 1st BZ. This is due to a property of ARPES. Maybe, Liu et al. are inadequately described. Precisely, we have to look at 'the FS in the 2nd BZ'. Here we see the two most characteristic cylindrical Fermi surfaces in the CRO. They are open only in the  $k_z$  direction, giving a strong anisotropy to conduction. In such a highly anisotropic system, the current flows depend on the crystal orientation. The electronic structure must be compared to the band calculation and discussed in relation to the orientation of the measured current.*

*If the requested comparison with ARPES is reconsidered well, we believe it deserves to be published for 'Nature communications'. If the correction is achieved without problems, no further review by me would be necessary.*

**Reply:** We thank the reviewer for the recognition of our efforts and the recommendation of this manuscript for publication in *Nature Communications* after minor revision. The suggestions greatly help us to improve our manuscript. We agree that the electronic structure of CRO is anisotropic, in agreement with the observation of the ARPES experiments. And it contributes to the anisotropy of the spin Hall effect.

To begin with, we review the anisotropic electronic structure of CRO. The surface states spectra of orthorhombic CRO at Fermi energy for the (001) and the (100) surfaces are obtained from DFT calculations, as shown in Figs. R1 **a-b**. The surface states of the (001) and the (100) surfaces show distinct features, and indicate that Fermi surfaces are open only in the  $k_z$  direction. The surface spectra from DFT calculations qualitatively match the experimental results of ARPES [Liu, Y. et al. Phys. Rev. B, 98, 041110 (2018)].

The deep relation between the anisotropy of band structure and the spin Hall effect can be described by the theoretical formula of the spin Hall effect

$$\sigma_{\alpha\beta;\gamma}(\omega) = -\frac{e^2}{h} \int_{BZ} \frac{d^3k}{(2\pi)^3} \Omega_{\alpha\beta;\gamma}(k), \quad (\text{R1})$$

$$\Omega_{\alpha\beta;\gamma}(k) = -2\hbar^2 \sum_n f_{nk} \sum_{n' \neq n} \text{Im} \left[ \frac{\langle nk | j_{\alpha\gamma} | n'k \rangle \langle n'k | v_\beta | nk \rangle}{(E_{n'} - E_n)^2 - (\hbar\omega + i\delta)^2} \right], \quad (\text{R2})$$

where the spin current operator is defined as  $j_{\alpha\gamma} = \frac{1}{2} \{s_\gamma, v_\alpha\}$ .  $s_\gamma$  is the spin operator and it is independent of the band structures.  $v_\alpha, v_\beta$  is the velocity operator and it can be associated with the band structures through

$$\langle v_\alpha \rangle = \frac{1}{\hbar} \left\langle \psi \left| \frac{\partial H}{\partial k_\alpha} \right| \psi \right\rangle = \frac{1}{\hbar} \frac{\partial \varepsilon}{\partial k_\alpha}. \quad (\text{R3})$$

42 Since the Fermi surface is the slice of the band structures at a fixed energy level, its anisotropic  
 43 shape reflects the anisotropy of the band dispersion, i.e., the  $\frac{\partial \varepsilon}{\partial k_\alpha}$ . Besides, the energy differences  
 44  $(E_{n'} - E_n)^2$  in the denominator are also determined by the band structures.

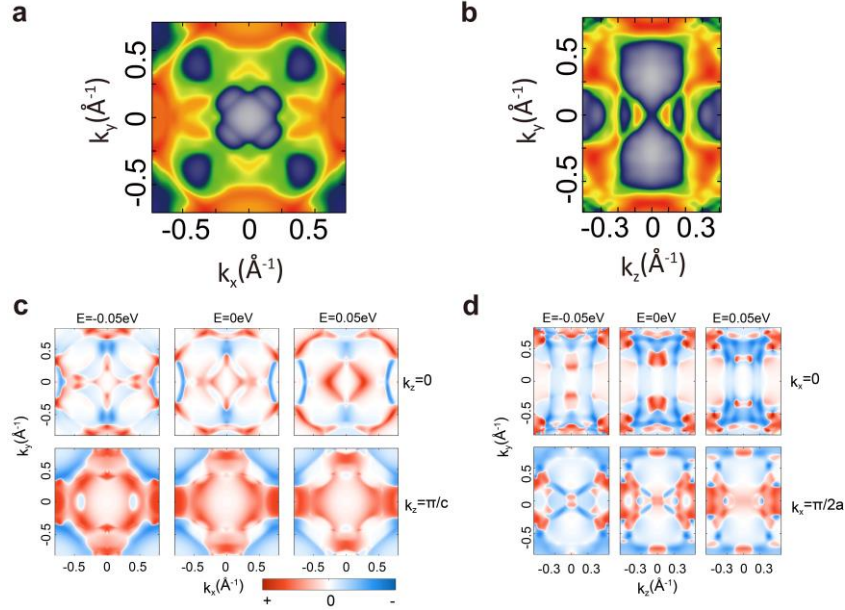

45  
 46 Fig. R1 **a, b** Surface states of orthorhombic CRO at Fermi energy for the (001) **(a)** and the (100) **(b)** surfaces,  
 47 respectively. **c, d** Distributions of the spin Berry curvature  $\Omega_{zx;y}$  at different energy levels (left panel:  $E = -0.05$  eV,  
 48 middle panel:  $E = 0$  eV, right panel:  $E = 0.05$  eV), for  $k_z$  cuts **(c)** and  $k_x$  cuts **(d)**.

49  
 50 **Following the reviewer's suggestion, we show the effect of anisotropic electronic structure on**  
 51 **the spin Hall conductivity (SHC) from two aspects. Firstly,** we calculate the  $k$ -resolved  
 52 distributions of the spin Berry curvature and find a correspondence with the band anisotropy. We  
 53 plot the distribution of  $\Omega_{zx;y}$  as an example in Figs. R1 **c-d**. It can be seen from the spin-Berry-  
 54 curvature distributions for the (001) film, that the pattern and the strength along the  $k_x$  and  $k_y$   
 55 directions are very close for different  $k$ -planes and energy levels. But for the (100) film, the pattern  
 56 and the strength along  $k_y$  and  $k_z$  directions show obvious differences. The calculated spin-Berry-  
 57 curvature distributions are consistent with the anisotropic electronic structure as shown in Figs. R1  
 58 **a-b**.

59  
 60 **Secondly,** we calculate the anisotropy of the SHC in relation to the orientation of the measured  
 61 current. We compare the SHC component  $\sigma_{zx;y}$ , which has been discussed in the manuscript, with  
 62  $\sigma_{xy;z}$  (the induce of SHC corresponding sequentially to the response current, the applied electric  
 63 field, and the spin polarization). The set-up planes of the applied and the response currents for the  
 64 two terms are [010] and [001] planes, respectively. It can show the anisotropy between the  $z$  and  
 65  $y$  directions. From Fig. R2 we can see  $\sigma_{zx;y}$  is about twice as much as  $\sigma_{xy;z}$  at the Fermi energy  
 66 (at  $E=0$  eV). This difference owes to the directions of band dispersions involved in SHC in Eq. (R1),  
 67 which includes  $v_z$  and  $v_x$  for  $\sigma_{zx;y}$  and  $v_y$  and  $v_x$  for  $\sigma_{xy;z}$ .  $\sigma_{zx;y}$  is enhanced by  $v_z$  due to  
 68 the anisotropic fermi surface along  $z$  direction. Our calculations demonstrate that the magnitude  
 69 of the response spin Hall current in CRO would rely on the measured current and the set-up plane.

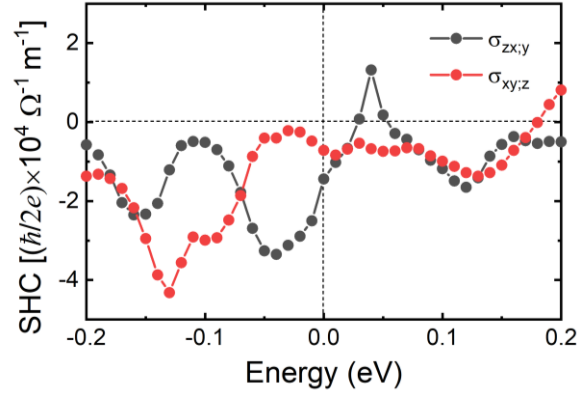

Fig. R2  $\sigma_{zx;y}$  and  $\sigma_{xy;z}$  of the spin Hall conductivities in CRO, calculated from DFT results.

70

71

72

73 Consequently, we confirm that the spectra of Fermi surfaces calculated by DFT are anisotropic,  
 74 which matches the ARPES results according to the comparison. This anisotropic electronic structure  
 75 results in the anisotropy of spin Hall current that the magnitude depends on crystal orientation,  
 76 which is consistent with the reviewer's inference.

77

78 In revision, the surface states spectra of orthorhombic CRO at Fermi energy, and the spin-Berry-  
 79 curvature distributions are added in Section 6 of Supplementary Information, the corresponding  
 80 discussion is added in the revised manuscript (Page 4, Line 160-163) and the reference [Liu, Y. et  
 81 al. Phys. Rev. B, 98, 041110 (2018)] is cited.

82

83 [Reply to Reviewer #3](#)

84

85 **Comment:** *The issues I commented on are clearly addressed, so I recommend this manuscript for*  
86 *publication.*

87

88 **Reply:** We thank the reviewer for acknowledging our revision and for recommending its publication  
89 in *Nature Communications*.



## **REVIEWERS' COMMENTS**

### **Reviewer #2 (Remarks to the Author):**

The issue that I commented on has been addressed.  
I recommend the manuscript for publication of Nature communications.

## Reply to Reviewer #2

**Comment:** *The issue that I commented on has been addressed.  
I recommend the manuscript for publication of Nature communications.*

**Reply:** We thank the reviewer for taking efforts to review and recommendation of this manuscript for publication in *Nature Communications*.
